# Supplementary material for: High pressure single-molecule FRET studies of the lysine riboswitch: cationic and osmolytic effects on pressure induced denaturation
Source: Royal Society of Chemistry journal article supplement (doi:10.1039/d0cp01921f), 2020-01-01

## Supporting Information

**Figure 1.** Lysine dependent folding at the ambient pressure obtained from smFRET (A) diffusing and (B) surface tether experiments. Data of fraction folded and  $k_{\text{fold}}$  are fit to the Hill equation with floating Hill coefficients  $n = 0.93(16)$  and  $1.12(17)$ , respectively, consistent with the expected ligand binding stoichiometry from crystal structure data. In smFRET diffusing experiments, the max folded fraction is observed as  $0.63(6)$  at saturating [lysine]. In surface tether experiments where the lysine-dependent folding and unfolding rates can be obtained by prolonged observation of the fluorescence signals from a single construct at a time, the  $k_{\text{unfold}}$  is found independent of [lysine] as  $0.213(14) \text{ s}^{-1}$  and the  $k_{\text{fold}}$  is determined as  $1.51(13) \text{ s}^{-1}$  at saturating [lysine], leading to the steady state folded fraction as  $0.88(9)$ . The difference in fraction folded ( $29(8) \%$ ) between the diffusing and surface tether measurements is made up by the subpopulation of constructs that are incapable of folding ( $28(4) \%$ ) from the previous raster scanned image.

Figure S1

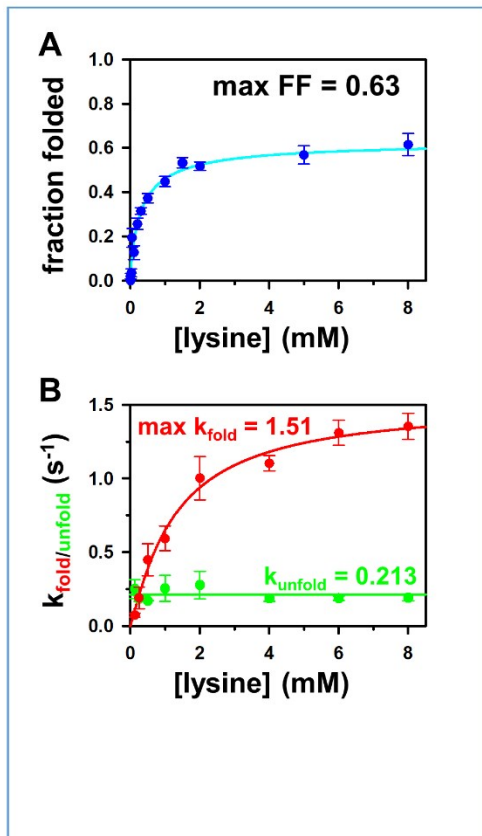

Supplement: d0cp01921f1.pdf [file d0cp01921f1.pdf]
